# Supplementary material for: Ordered patterning of the sensory system is susceptible to stochastic features of gene expression
Source: eLife. 2020 Feb 26;9:e53638. doi: 10.7554/eLife.53638 (PMC7064346; doi:10.7554/eLife.53638)
Supplement: Figure 3—source data 1. — Default parameter values (indicated in bold) were used for all simulations unless noted. [file elife-53638-fig3-data1.xlsx]

## Sheet: Sheet1
Rate Parameter	Value	Figure	Source
mRNA synthesis rate Sm	0.25 mRNA/min	Default	Milo and Phillips 2016
	0.1 - 1.0 mRNA/min	Figure 3B
	0.2 - 0.5 mRNA/min	Figure 6E
mRNA decay rate Dm	0.0462 mRNA/min	Default	Measured in this paper
	0.04 - 1.0 mRNA/min	Figure 3 - figure supplement 1D
protein synthesis rate Sp	0.5 proteins/min	Figures 3, 4E	Inferred for sens
	1.0 proteins/min	Default	Inferred for sens[m1m2]
protein decay rate Dp	0.002 proteins/min		Measured in this paper
	0.01 proteins/min	Default
promoter activation rate kon	0.025 - 10 events/min	Default
	1.0 events/min	Figure 3F
promoter inactivation rate koff	0.025 - 3.0 events/min	Figure 3F
	0.05 events/min	Default
