# Supplementary material for: Ordered patterning of the sensory system is susceptible to stochastic features of gene expression
Source: eLife. 2020 Feb 26;9:e53638. doi: 10.7554/eLife.53638 (PMC7064346; doi:10.7554/eLife.53638)
Supplement: Figure 7—source data 1. — For each genotype, the proportion of wings containing at least one ectopic mechanosensory bristle was calculated. To compare between two genotypes, the odds ratio (of wings with ectopic bristles) was calculated from these proportions. Test column indicates the variable being compared (genomic locus of sens alleles, or presence of miR-9a binding sites in the sens 3’UTR) across each subgroup. Fisher’s exact test was used to determine if the odds ratio was not equal to 1. Odds ratios significantly different from one are highlighted in bold (*p-value<0.05, ** p-value<0.01, *** p-value<0.005, p-value>0.05, not significant). [file elife-53638-fig7-data1.xlsx]

## Sheet: Sheet1
Test	Subgroup	Odds ratio	95% confidence interval	z statistic	Significance level
57F5/57F5 vs 22A3/22A3	Parental stock	0.68	0.01-34.93	0.19	p = 0.8497
	sens (+miR-9a)	12.32	2.78-54.68	3.303	p = 0.0010
	sens (-miR-9a)	6.04	1.63-22.42	2.686	p = 0.0072
57F5/57F5 vs 22A3/57F5	Parental stock	0.68	0.01-34.98	0.19	p = 0.8497
	sens (+miR-9a)	24.23	3.16-185.48	3.07	p = 0.0021
	sens (-miR-9a)	3.39	1.03-11.17	2.013	p = 0.0441
22A3/22A3 vs 22A3/57F5	Parental stock	1	0.02-51.22	0	p = 1.0000
	sens (+miR-9a)	1.97	0.17-22.28	0.546	p = 0.5850
	sens (-miR-9a)	0.56	0.12-2.61	0.735	p = 0.4622
sens (+miR-9a) vs sens (-miR-9a)	22A3/22A3	0.89	0.14-5.49	0.127	p = 0.8991
	57F5/57F5	1.8	0.82-4.01	1.473	p = 0.1409
	22A3/57F5	0.25	0.028-2.34	1.209	p = 0.2268
